# Supplementary material
Source: ML conference proceedings conference paper supplement (https://openaccess.thecvf.com/content/ICCV2025/html/Ying_MOVE_Motion-Guided_Few-Shot_ICCV_2025_paper.html)
Supplement: Supplementary file 1 [file Ying_MOVE_Motion-Guided_Few-Shot_ICCV_2025_supplemental.pdf]

# Supplementary Material for MOVE: Motion-Guided Few-Shot Video Object Segmentation

Kaining Ying\* Hengrui Hu\* Henghui Ding✉

Fudan University, China

<https://henghuiding.com/MOVE/>

## A. Dataset

### A.1. Vocabulary Distribution

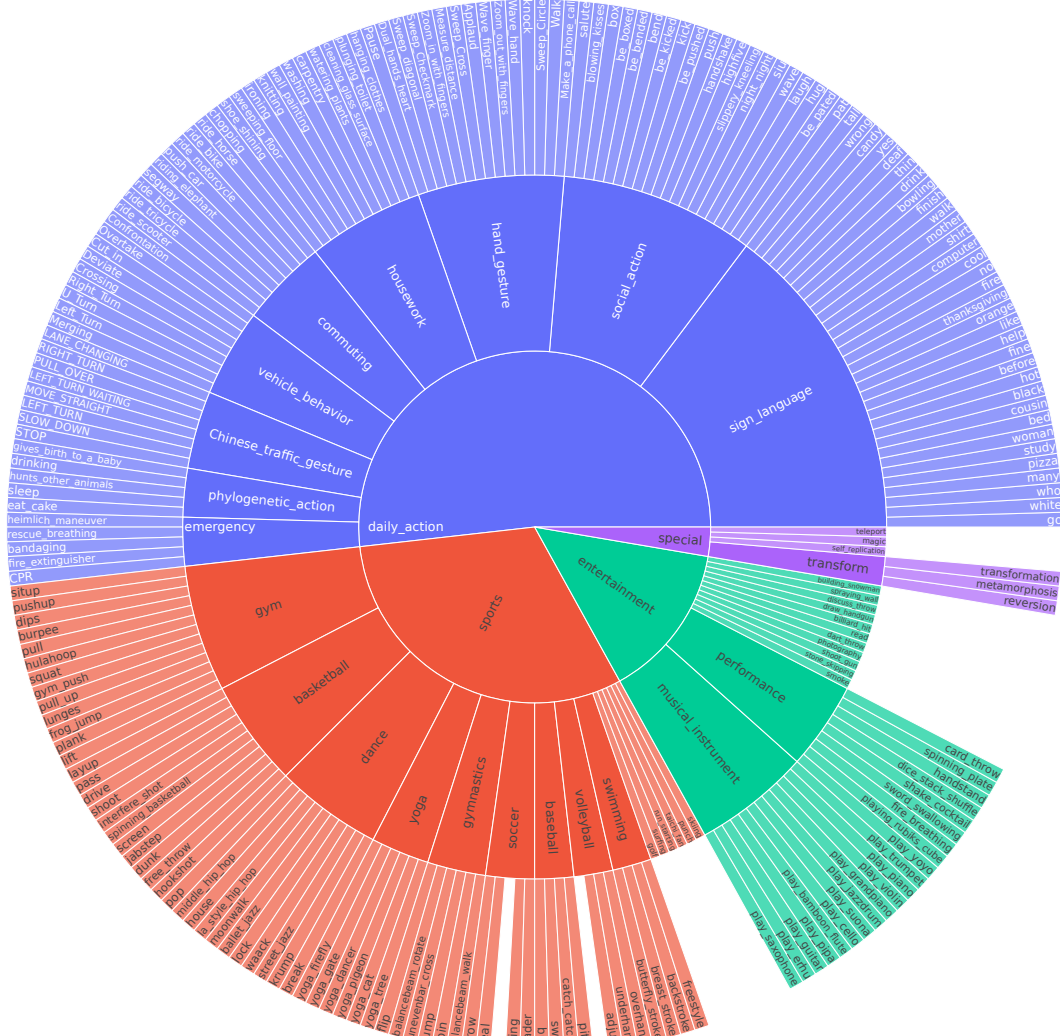

Figure I. The motion category distribution of our proposed MOVE.

As shown in Figure I, our motion categories are hierarchically distributed, with a total of 229 subcategories divided into 4 main categories. This ensures the diversity of our dataset.

\*Equal contribution. ✉ Corresponding author (henghui.ding@gmail.com).

## A.2. Dataset Source

We show the source of the dataset for each motion category in Tables I to V.

Table I. Dataset source of MOVE (part 1).

| Node 1 | Node 2     | Node 3           | Node 4          | Source          |
|--------|------------|------------------|-----------------|-----------------|
| sports | soccer     | steal            |                 | MultiSports [8] |
|        |            | throw            | football throw  | MultiSports [8] |
|        |            |                  | soccer throw    | HAA500 [2]      |
|        |            | shoot            | football shoot  | MultiSports [8] |
|        |            |                  | soccer shoot    | HAA500 [2]      |
|        |            | diving           |                 | MultiSports [8] |
|        |            | header           |                 | HAA500 [2]      |
|        | basketball | pass             |                 | MultiSports [8] |
|        |            | screen           |                 | MultiSports [8] |
|        |            | 3-point shot     |                 | MultiSports [8] |
|        |            | free throw       |                 | MultiSports [8] |
|        |            | block            |                 | MultiSports [8] |
|        |            | dunk             |                 | HAA500 [2]      |
|        |            | hookshot         |                 | HAA500 [2]      |
|        |            | layup            |                 | HAA500 [2]      |
|        |            | jabstep          |                 | HAA500 [2]      |
|        |            | spinning         |                 | HAA500 [2]      |
|        | baseball   | swing            |                 | HAA500 [2]      |
|        |            | catch            |                 | HAA500 [2]      |
|        |            | bunt             |                 | HAA500 [2]      |
|        |            | pitch            |                 | HAA500 [2]      |
|        | volleyball | underhand        |                 | HAA500 [2]      |
|        |            | set              |                 | HAA500 [2]      |
|        |            | overhand         |                 | HAA500 [2]      |
|        | dance      | pass             |                 | HAA500 [2]      |
|        |            | break            |                 | AIST Dance [7]  |
|        |            | pop              |                 | AIST Dance [7]  |
|        |            | lock             |                 | AIST Dance [7]  |
|        |            | middle hip-hop   |                 | AIST Dance [7]  |
|        |            | LA style hip-hop |                 | AIST Dance [7]  |
|        |            | house            |                 | AIST Dance [7]  |
|        |            | waack            |                 | AIST Dance [7]  |
|        |            | krump            |                 | AIST Dance [7]  |
|        |            | street jazz      |                 | AIST Dance [7]  |
|        |            | ballet jazz      |                 | AIST Dance [7]  |
|        |            | moonwalk         |                 | HAA500 [2]      |
|        | gym        | push up          | pushup          | HAA500 [2]      |
|        |            |                  | one_arm_push_up | HAA500 [2]      |
|        |            | situp            | situp           | HAA500 [2]      |
|        |            |                  | situp           | HMDB [6]        |
|        |            | burpee           |                 | HAA500 [2]      |
|        |            | dips             |                 | HAA500 [2]      |
|        |            | pull up          |                 | HAA500 [2]      |
|        |            | cartwheel        |                 | HAA500 [2]      |
|        |            | lift             |                 | HAA500 [2]      |

Table II. Dataset source of MOVE (part 2).

| Node 1 | Node 2        | Node 3             | Node 4             | Source     |
|--------|---------------|--------------------|--------------------|------------|
| sports | gym           | push               |                    | HAA500 [2] |
|        |               | lunges             |                    | HAA500 [2] |
|        |               | plank              |                    | HAA500 [2] |
|        |               | pull               |                    | HAA500 [2] |
|        |               | squat              |                    | HAA500 [2] |
|        |               | frog jump          |                    | HAA500 [2] |
|        | yoga          | cat                |                    | HAA500 [2] |
|        |               | dancer             |                    | HAA500 [2] |
|        |               | tree               |                    | HAA500 [2] |
|        |               | firefly            |                    | HAA500 [2] |
|        |               | gate               |                    | HAA500 [2] |
|        |               | pigeon             |                    | HAA500 [2] |
|        | gymnastics    | unevenbar.cross    |                    | HAA500 [2] |
|        |               | flip               | unevenbar flip     | HAA500 [2] |
|        |               |                    | balancebeam flip   | HAA500 [2] |
|        |               |                    | horizontalbar flip | HAA500 [2] |
|        |               | spin               | unevenbar spin     | HAA500 [2] |
|        |               |                    | balancebeam spin   | HAA500 [2] |
|        |               |                    | horizontalbar spin | HAA500 [2] |
|        |               | land               | unevenbar land     | HAA500 [2] |
|        |               |                    | horizontalbar land | HAA500 [2] |
|        |               | jump               | balancebeam jump   | HAA500 [2] |
|        |               |                    | unevenbar jump     | HAA500 [2] |
|        |               |                    | horizontalbar jump | HAA500 [2] |
|        | swim          | balancebeam rotate |                    | HAA500 [2] |
|        |               | balancebeam walk   |                    | HAA500 [2] |
|        |               | backstroke         |                    | HAA500 [2] |
|        |               | breast stroke      |                    | HAA500 [2] |
|        |               | butterfly stroke   |                    | HAA500 [2] |
|        | golf          | freestyle          |                    | HAA500 [2] |
|        |               | golf swing         |                    | HAA500 [2] |
|        |               | golf               |                    | HMDB [6]   |
|        | surfing       |                    |                    | HAA500 [2] |
|        | skiing        |                    |                    | HAA500 [2] |
|        | punch         | punching speedbag  |                    | HAA500 [2] |
|        |               | punching sandbag   |                    | HAA500 [2] |
|        | taichi fan    |                    |                    | HAA500 [2] |
|        | discuss throw |                    |                    | HAA500 [2] |
|        | dart throw    |                    |                    | HAA500 [2] |

Table III. Dataset source of MOVE (part 3).

| Node 1       | Node 2               | Node 3                | Node 4    | Source          |
|--------------|----------------------|-----------------------|-----------|-----------------|
| daily action | phylogenetic actions | give birth            |           | MammalNet [1]   |
|              |                      | eat                   | apple     | HAA500 [2]      |
|              |                      |                       | cake      | HAA500 [2]      |
|              |                      |                       | burger    | HAA500 [2]      |
|              |                      |                       | ice-cream | HAA500 [2]      |
|              |                      |                       | noodles   | HAA500 [2]      |
|              |                      | drinking              |           | HAA500 [2]      |
|              |                      | sleep                 |           | Internet        |
|              |                      | hunt                  |           | MammalNet [1]   |
|              | hand gesture         | Sweep Circle          |           | EgoGesture [10] |
|              |                      | sweep cross           |           | EgoGesture [10] |
|              |                      | sweep checkmark       |           | EgoGesture [10] |
|              |                      | measure distance      |           | EgoGesture [10] |
|              |                      | pause                 |           | EgoGesture [10] |
|              |                      | make a phone call     |           | EgoGesture [10] |
|              |                      | walk                  |           | EgoGesture [10] |
|              |                      | applaud               |           | EgoGesture [10] |
|              |                      | sweep diagonal        |           | EgoGesture [10] |
|              |                      | dual hands heart      |           | EgoGesture [10] |
|              |                      | wave hand             |           | EgoGesture [10] |
|              |                      | wave finger           |           | EgoGesture [10] |
|              |                      | knock                 |           | EgoGesture [10] |
|              |                      | zoom in with fingers  |           | EgoGesture [10] |
|              |                      | zoom out with fingers |           | EgoGesture [10] |
|              | sign language        | drink                 |           | WLASL [3]       |
|              |                      | computer              |           | WLASL [3]       |
|              |                      | before                |           | WLASL [3]       |
|              |                      | yes                   |           | WLASL [3]       |
|              |                      | go                    |           | WLASL [3]       |
|              |                      | who                   |           | WLASL [3]       |
|              |                      | thin                  |           | WLASL [3]       |
|              |                      | cool                  |           | WLASL [3]       |
|              |                      | like                  |           | WLASL [3]       |
|              |                      | mother                |           | WLASL [3]       |
|              |                      | candy                 |           | WLASL [3]       |
|              |                      | no                    |           | WLASL [3]       |
|              |                      | thanksgiving          |           | WLASL [3]       |
|              |                      | cousin                |           | WLASL [3]       |
|              |                      | deaf                  |           | WLASL [3]       |
|              |                      | hot                   |           | WLASL [3]       |
|              |                      | woman                 |           | WLASL [3]       |
|              |                      | bed                   |           | WLASL [3]       |
|              |                      | bowling               |           | WLASL [3]       |
|              |                      | kiss                  |           | WLASL [3]       |
|              |                      | shirt                 |           | WLASL [3]       |
|              |                      | study                 |           | WLASL [3]       |

Table IV. Dataset source of MOVE (part 4).

| Node 1       | Node 2          | Node 3            | Node 4            | Source              |
|--------------|-----------------|-------------------|-------------------|---------------------|
| daily action | traffic gesture | stop              |                   | chinese traffic [4] |
|              |                 | move straight     |                   | chinese traffic [4] |
|              |                 | left turn         |                   | chinese traffic [4] |
|              |                 | left turn waiting |                   | chinese traffic [4] |
|              |                 | right turn        |                   | chinese traffic [4] |
|              |                 | lane changing     |                   | chinese traffic [4] |
|              |                 | slow down         |                   | chinese traffic [4] |
|              |                 | pull over         |                   | chinese traffic [4] |
|              | social action   |                   | siu               | Internet            |
|              |                 | celebrate         | night night       | Internet            |
|              |                 |                   | slippery kneeling | Internet            |
|              |                 | hug               | hugging animal    | HAA500 [2]          |
|              |                 |                   | hugging person    | HAA500 [2]          |
|              |                 |                   | hug               | BIT [5]             |
|              |                 | handshake         | handshake dog     | HAA500 [2]          |
|              |                 |                   | handshake         | BIT [5]             |
|              |                 | highfive          | dog highfive      | HAA500 [2]          |
|              |                 |                   | high five         | HAA500 [2]          |
|              |                 |                   | highfive          | BIT [5]             |
|              |                 | pat               | pat               | BIT [5]             |
|              |                 |                   | be pated          | BIT [5]             |
|              |                 | push              | push person       | BIT [5]             |
|              |                 |                   | be pushed         | BIT [5]             |
|              |                 | bend              | bend              | BIT [5]             |
|              |                 |                   | be bended         | BIT [5]             |
|              |                 | box               | box               | BIT [5]             |
|              |                 |                   | be boxed          | BIT [5]             |
|              |                 | kick              | kick              | BIT [5]             |
|              |                 |                   | be kicked         | BIT [5]             |
|              |                 | salute            |                   | HAA500 [2]          |
|              |                 | laugh             |                   | HMDB [6]            |
|              |                 | wave              | wave              | HMDB [6]            |
|              |                 |                   | arm wave          | HAA500 [2]          |
|              | commuting       | ride bike         |                   | HAA500 [2]          |
|              |                 | ride motorcycle   |                   | HAA500 [2]          |
|              |                 | ride scooter      |                   | HAA500 [2]          |
|              |                 | segway            |                   | HAA500 [2]          |
|              |                 | ride horse        | ride horse        | HAA500 [2]          |
|              |                 |                   | ride horse        | HMDB [6]            |
|              |                 |                   | equestrian run    | HAA500 [2]          |
|              |                 | riding element    |                   | HAA500 [2]          |
|              |                 | push car          |                   | HAA500 [2]          |
|              |                 | drive car         |                   | Internet            |

Table V. Dataset source of MOVE (part 5).

| Node 1        | Node 2             | Node 3              | Node 4       | Source     |
|---------------|--------------------|---------------------|--------------|------------|
| daily action  | vehicle behavior   | Confrontation       |              | IDDX [9]   |
|               |                    | Cut-in              |              | IDDX [9]   |
|               |                    | merging             |              | IDDX [9]   |
|               |                    | left turn           |              | IDDX [9]   |
|               |                    | deviate             |              | IDDX [9]   |
|               |                    | crossing            |              | IDDX [9]   |
|               |                    | overtake            |              | IDDX [9]   |
|               |                    | u-turn              |              | IDDX [9]   |
|               |                    | right turn          |              | IDDX [9]   |
|               | emergency          | fire extinguisher   |              | HAA500 [2] |
|               |                    | bandaging           |              | HAA500 [2] |
|               |                    | heimlich maneuver   |              | HAA500 [2] |
|               |                    | cpr                 |              | HAA500 [2] |
|               |                    | rescue breathing    |              | HAA500 [2] |
| entertainment | musical instrument | violin              |              | HAA500 [2] |
|               |                    | piano               |              | HAA500 [2] |
|               |                    | pipa                |              | Internet   |
|               |                    | cello               |              | HAA500 [2] |
|               |                    | erhu                |              | HAA500 [2] |
|               |                    | jazz drum           |              | HAA500 [2] |
|               |                    | trumpet             |              | HAA500 [2] |
|               |                    | suona               |              | HAA500 [2] |
|               |                    | bamboo flute        |              | Internet   |
|               |                    | saxophone           |              | HAA500 [2] |
|               | performance        | guitar              |              | HAA500 [2] |
|               |                    | playing yoyo        |              | HAA500 [2] |
|               |                    | sword swallowing    |              | HAA500 [2] |
|               |                    | fire breathing      |              | HAA500 [2] |
|               |                    | handstand           |              | HAA500 [2] |
|               |                    | card throw          |              | HAA500 [2] |
|               |                    | dice stack shuffle  |              | HAA500 [2] |
|               |                    | shake cocktail      |              | HAA500 [2] |
|               |                    | playing rubiks cube |              | HAA500 [2] |
|               |                    | spinning plate      |              | HAA500 [2] |
|               | smoke              | smoking exhale      |              | HAA500 [2] |
|               |                    | smoking inhale      |              | HAA500 [2] |
|               |                    | smoke               |              | HMDB [6]   |
|               | draw handgun       |                     |              | HAA500 [2] |
|               | shooting handgun   |                     |              | HAA500 [2] |
|               | shooting shotgun   |                     |              | HAA500 [2] |
|               | stone skipping     |                     |              | HAA500 [2] |
|               | building snowman   |                     |              | HAA500 [2] |
|               | billiard hit       |                     |              | HAA500 [2] |
| special       | transform          | transformer         | robot to car | Internet   |
|               |                    |                     | car to robot | Internet   |
|               |                    | metamorphosis       |              | Internet   |
|               | magic              |                     |              | Internet   |
|               | telesport          |                     |              | Internet   |
|               | self replication   |                     |              | Internet   |

### A.3. Object Category Distribution

Table VI. Object categories in MOVE grouped into 5 main categories.

| Main Category | Object Classes                                                                                                                                                                                                                                                                                                                                                                                                                                                         |
|---------------|------------------------------------------------------------------------------------------------------------------------------------------------------------------------------------------------------------------------------------------------------------------------------------------------------------------------------------------------------------------------------------------------------------------------------------------------------------------------|
| Person        | person, athlete, dancer, performer, woodworker, musician, soldier, chef, gunner, mage, horseman                                                                                                                                                                                                                                                                                                                                                                        |
| Animal        | cat, dog, panda, fox, cheetah, rabbit, lion, tiger, bear, horse, monkey, jaguar, pig, llama, mouse, elephant, squirrel, wildebeest, cow, deer, hamster, manatee, kapibala, giraffe, husky dog, sheep, caracal, alpaca, seal, malamute, frog, bulldog, camel, gibbon, snow leopard, chinchilla, lynx, red fox, tigger, terrier, red-panda, flying fox, donkey, buffalo, duck, raccoon, marmot, hyena, turtle, blue whale, killer whale, ermine, serval, lizard, caribou |
| Vehicle       | motorcycle, car, truck, autorickshaw, bus, bicycle                                                                                                                                                                                                                                                                                                                                                                                                                     |
| Limbs         | hand, mouth                                                                                                                                                                                                                                                                                                                                                                                                                                                            |
| Others        | robot, extinguisher, toy, cartoon, sculpture, dinosaur, dragon, hamburger, wind, orcs, other                                                                                                                                                                                                                                                                                                                                                                           |

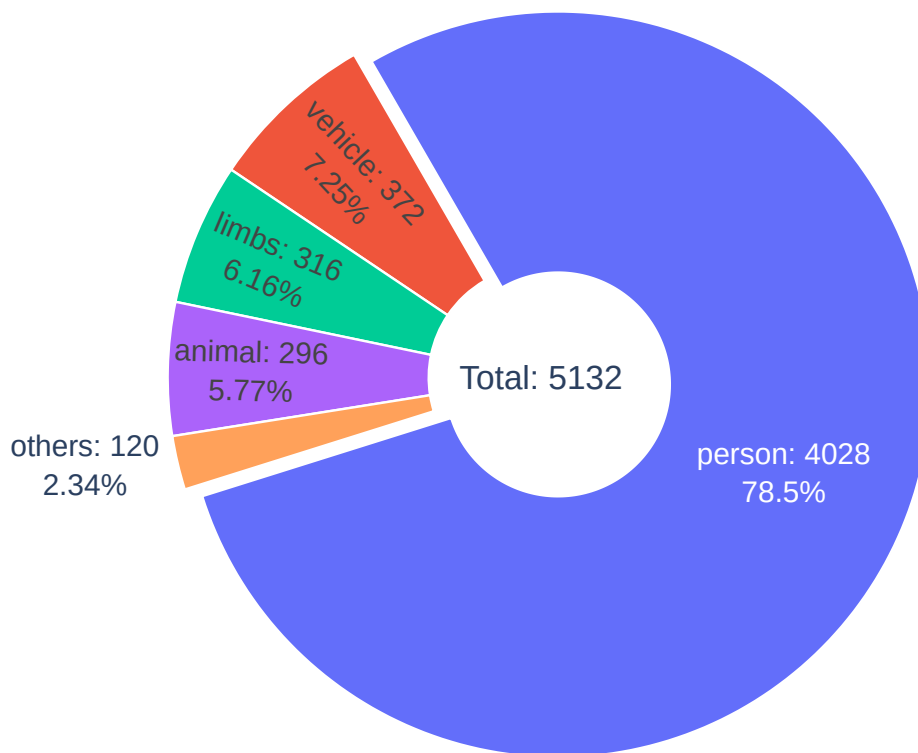

Figure II. The object category distribution of our proposed MOVE.

Our dataset contains 88 object categories that can be grouped into 5 main categories: person, animal, vehicle, limbs, and others. Table VI shows the detailed categorization of all object classes in our dataset. As shown in Figure II, the distribution of these object categories reflects the diversity and flexibility of the motion in our dataset.

## A.4. Dataset Split

### A.4.1. Overlapping Split

Table VII. Statistics of the overlapping split in MOVE.

| Folder   | # Categories | # Objects | # Videos |
|----------|--------------|-----------|----------|
| Folder-1 | 56           | 1209      | 1110     |
| Folder-2 | 56           | 1427      | 1234     |
| Folder-3 | 56           | 1340      | 1267     |
| Folder-4 | 56           | 1513      | 1287     |

As shown in Table VII, we divide our dataset into 4 folders for the overlapping split (OS), ensuring a balanced distribution of actions, objects, and videos across folders. Table IX and Table X show the detailed statistics of each folder. Each group contains 56 diverse actions spanning daily activities, sports, entertainment, and special effects. The distribution ensures that each group has a representative sample of the full dataset, allowing for effective cross-validation during model development and evaluation. In the overlapping split, actions from the same parent category can appear across different folders, which enables the model to learn generalizable features within similar action types while still maintaining diversity in each split.

### A.4.2. Non-Overlapping Split

Table VIII. Statistics of the non-overlapping split in MOVE.

| Folder   | # Categories | # Objects | # Videos |
|----------|--------------|-----------|----------|
| Folder-1 | 56           | 1071      | 1070     |
| Folder-2 | 60           | 1793      | 1232     |
| Folder-3 | 53           | 1217      | 957      |
| Folder-4 | 55           | 1051      | 1040     |

As shown in Table VIII, we divide our dataset into 4 folders for the non-overlapping split (NS), where we categorize actions based on their second-level parent nodes. Table XI and Table XII show the detailed statistics of each folder. Compared to the overlapping split, this approach presents a greater challenge as it creates larger domain gaps between different folders. This design intentionally tests models' ability to generalize across more distinct action categories.



Table IX. Motion categories in folder-1 and folder-2 of the overlapping split.

| Folder   | Motions                                                                                                                                                                                                                                                                                                                                                                                                                                                                                                                                                                                                                                                                                                                                                                                                                                                                                                                                                                                                                                                                                                                                                                                                                                                                                                                                                                                                                                                                                                                                                                                                                                                                                                                                                                                                                                                                                                                                                                                                                                                         |
|----------|-----------------------------------------------------------------------------------------------------------------------------------------------------------------------------------------------------------------------------------------------------------------------------------------------------------------------------------------------------------------------------------------------------------------------------------------------------------------------------------------------------------------------------------------------------------------------------------------------------------------------------------------------------------------------------------------------------------------------------------------------------------------------------------------------------------------------------------------------------------------------------------------------------------------------------------------------------------------------------------------------------------------------------------------------------------------------------------------------------------------------------------------------------------------------------------------------------------------------------------------------------------------------------------------------------------------------------------------------------------------------------------------------------------------------------------------------------------------------------------------------------------------------------------------------------------------------------------------------------------------------------------------------------------------------------------------------------------------------------------------------------------------------------------------------------------------------------------------------------------------------------------------------------------------------------------------------------------------------------------------------------------------------------------------------------------------|
| Folder-1 | <p>daily_action-phylogenetic_action-eat_cake, entertainment-performance-spinning_plate, sports-soccer-header, sports-volleyball-overhand, daily_action-hand_gesture-Zoom_in_with_fingers, sports-dance-house, daily_action-sign_language-cool, sports-dance-lock, sports-basketball-interfere_shot, daily_action-social_action-be_bended, daily_action-emergency-bandaging, daily_action-hand_gesture-Sweep_Checkmark, daily_action-social_action-celebrate-slippery_kneeling, entertainment-musical_instrument-play_suona, entertainment-performance-card_throw, daily_action-social_action-salute, daily_action-sign_language-black, entertainment-musical_instrument-play_violin, entertainment-musical_instrument-play_trumpet, daily_action-phylogenetic_action-sleep, daily_action-social_action-celebrate-night_night, daily_action-chinese_traffic_gesture-RIGHT_TURN, sports-taichi_fan, daily_action-hand_gesture-Zoom_out_with_fingers, sports-yoga-yoga_cat, daily_action-chinese_traffic_gesture-STOP, entertainment-draw_handgun, sports-gym-frog_jump, daily_action-sign_language-hot, daily_action-commuting-ride_scooter, sports-punch, daily_action-chinese_traffic_gesture-LANE_CHANGING, entertainment-performance-dice_stack_shuffle, daily_action-social_action-bend, sports-gymnastics-balancebeam_walk, daily_action-hand_gesture-Sweep_Circle, daily_action-sign_language-fine, daily_action-sign_language-yes, daily_action-social_action-pat, sports-yoga-yoga_gate, special-transform-transformation, sports-baseball-swing, daily_action-vehicle_behavior-Deviate, daily_action-commuting-segway, sports-gym-lift, daily_action-sign_language-mother, sports-swimming-freestyle, entertainment-musical_instrument-play_cello, sports-basketball-screen, sports-dance-ballet_jazz, daily_action-commuting-ride_motorcycle, entertainment-building-snowman, entertainment-musical_instrument-play_grandpiano, entertainment-musical_instrument-play_pipa, daily_action-sign_language-wrong, daily_action-vehicle_behavior-U_Turn</p> |
| Folder-2 | <p>daily_action-sign_language-walk, daily_action-hand_gesture-Make_a_phone_call, daily_action-sign_language-help, daily_action-social_action-box, daily_action-sign_language-before, daily_action-social_action-celebrate-siu, sports-dance-street_jazz, daily_action-sign_language-many, daily_action-sign_language-white, sports-basketball-free_throw, entertainment-billiard_hit, daily_action-phylogenetic_action-gives_birth_to_a_baby, sports-skiing, daily_action-sign_language-computer, daily_action-housework-plunging_toilet, daily_action-commuting-riding_elephant, daily_action-social_action-hug, sports-soccer-shoot, sports-volleyball-adjust, daily_action-sign_language-deaf, daily_action-chinese_traffic_gesture-MOVE_STRAIGHT, daily_action-phylogenetic_action-hunts_other_animals, daily_action-vehicle_behavior-Crossing, daily_action-social_action-be_pated, daily_action-social_action-kick, sports-gymnastics-unevenbar_cross, sports-gym-gym_push, daily_action-sign_language-bed, sports-baseball-bunt, sports-gymnastics-jump, daily_action-housework-hanging_clothes, daily_action-commuting-ride_bicycle, entertainment-shoot_gun, sports-volleyball-pass, entertainment-read, daily_action-emergency-rescue_breathing, special-self_replication, sports-gym-squat, entertainment-performance-fire_breathing, entertainment-performance-playing_rubiks_cube, daily_action-sign_language-thanksgiving, daily_action-sign_language-shirt, entertainment-performance-handstand, daily_action-chinese_traffic_gesture-PULL_OVER, daily_action-housework-shoe_shining, daily_action-vehicle_behavior-Confrontation, sports-dance-waack, daily_action-hand_gesture-Walk, daily_action-social_action-be_pushed, sports-baseball-pitch, daily_action-hand_gesture-Wave_finger, sports-baseball-catch_catcher, daily_action-vehicle_behavior-Merging, daily_action-sign_language-bowling, sports-swimming-backstroke, sports-gym-situp</p>                                                                                            |

Table X. Motion categories in folder-3 and folder-4 of the overlapping split.

| Folder   | Motions                                                                                                                                                                                                                                                                                                                                                                                                                                                                                                                                                                                                                                                                                                                                                                                                                                                                                                                                                                                                                                                                                                                                                                                                                                                                                                                                                                                                                                                                                                                                                                                                                                                                                                                                                                                                                                                                               |
|----------|---------------------------------------------------------------------------------------------------------------------------------------------------------------------------------------------------------------------------------------------------------------------------------------------------------------------------------------------------------------------------------------------------------------------------------------------------------------------------------------------------------------------------------------------------------------------------------------------------------------------------------------------------------------------------------------------------------------------------------------------------------------------------------------------------------------------------------------------------------------------------------------------------------------------------------------------------------------------------------------------------------------------------------------------------------------------------------------------------------------------------------------------------------------------------------------------------------------------------------------------------------------------------------------------------------------------------------------------------------------------------------------------------------------------------------------------------------------------------------------------------------------------------------------------------------------------------------------------------------------------------------------------------------------------------------------------------------------------------------------------------------------------------------------------------------------------------------------------------------------------------------------|
| Folder-3 | <p>daily_action-sign_language-tall, sports-swimming-butterfly_stroke, sports-basketball-spinning_basketball, entertainment-performance-play_yoyo, daily_action-chinese_traffic_gesture-LEFT_TURN_WAITING, daily_action-sign_language-orange, entertainment-performance-sword_swallowing, daily_action-social_action-be_kicked, daily_action-sign_language-go, daily_action-chinese_traffic_gesture-SLOW_DOWN, sports-basketball-layup, entertainment-musical_instrument-play_jazzdrum, sports-basketball-drive, entertainment-performance-shake_cocktail, sports-basketball-jabstep, daily_action-sign_language-candy, daily_action-housework-watering_plants, daily_action-hand_gesture-Dual_hands_heart, entertainment-photography, sports-yoga-yoga_firefly, special-transform-reversion, daily_action-housework-washing, sports-gym-hula hoop, sports-dance-krump, daily_action-sign_language-fire, daily_action-commuting-push_car, entertainment-discuss_throw, daily_action-social_action-be_boxed, sports-gymnastics-balancebeam_rotate, daily_action-social_action-wave, sports-basketball-hookshot, sports-yoga-yoga_tree, daily_action-sign_language-who, daily_action-sign_language-cousin, daily_action-hand_gesture-Measure_distance, daily_action-housework-carpentry, daily_action-social_action-laugh, sports-run_starting, daily_action-social_action-handshake, sports-yoga-yoga_dancer, daily_action-hand_gesture-knock, sports-gym-dips, sports-gym-burpee, daily_action-sign_language-pizza, sports-dance-pop, daily_action-vehicle_behavior-Right_Turn, daily_action-sign_language-drink, sports-dance-middle_hip_hop, daily_action-vehicle_behavior-Overtake, sports-surfing, entertainment-musical_instrument-play_bamboo_flute, entertainment-smoke, special-magic, sports-golf, daily_action-sign_language-no, daily_action-vehicle_behavior-Left_Turn</p> |
| Folder-4 | <p>sports-gymnastics-flip, entertainment-dart_throw, daily_action-hand_gesture-Wave_hand, sports-gym-pull, daily_action-social_action-highfive, sports-dance-la_style_hip_hop, daily_action-hand_gesture-Sweep_Cross, daily_action-sign_language-like, sports-dance-moonwalk, sports-gym-plank, sports-gym-pull_up, daily_action-housework-ironing, sports-soccer-diving, daily_action-hand_gesture-Applaud, daily_action-sign_language-study, sports-volleyball-underhand, daily_action-emergency-CPR, entertainment-stone_skipping, sports-yoga-yoga_pigeon, daily_action-sign_language-woman, daily_action-social_action-push, daily_action-emergency-heimlich_maneuver, sports-basketball-shoot, sports-basketball-dunk, sports-gym-pushup, daily_action-housework-chopping, sports-basketball-pass, daily_action-chinese_traffic_gesture-LEFT_TURN, daily_action-social_action-blowing_kisses, daily_action-sign_language-finish, daily_action-vehicle_behavior-Cut_in, daily_action-commuting-ride_bike, entertainment-musical_instrument-play_guitar, daily_action-housework-knitting, sports-soccer-throw, sports-swimming-breast_stroke, sports-dance-break, daily_action-hand_gesture-Pause, daily_action-housework-sweeping_floor, daily_action-sign_language-thin, sports-gym-lunges, daily_action-emergency-fire_extinguisher, entertainment-musical_instrument-play_saxophone, daily_action-commuting-ride_horse, daily_action-hand_gesture-Sweep_diagonal, special-transform-metamorphosis, daily_action-phylogenetic_action-drinking, daily_action-housework-wall_painting, entertainment-spraying_wall, sports-gymnastics-spin, entertainment-musical_instrument-play_piano, daily_action-commuting-ride_tricycle, daily_action-housework-cleaning_glass_surface, special-teleport, sports-soccer-steal, entertainment-musical_instrument-play_erhu</p>              |

Table XI. Motion categories in the folder-1 and folder-2 of the non-overlapping split.

| Group    | Motions                                                                                                                                                                                                                                                                                                                                                                                                                                                                                                                                                                                                                                                                                                                                                                                                                                                                                                                                                                                                                                                                                                                                                                                                                                                                                                                                                                                                                                                                                                                                                                                                                                                                                                                                                                                                                                                                                                                                                                                                                                                                                                                                                                                                                                                                                                                                                                                                                                                                                 |
|----------|-----------------------------------------------------------------------------------------------------------------------------------------------------------------------------------------------------------------------------------------------------------------------------------------------------------------------------------------------------------------------------------------------------------------------------------------------------------------------------------------------------------------------------------------------------------------------------------------------------------------------------------------------------------------------------------------------------------------------------------------------------------------------------------------------------------------------------------------------------------------------------------------------------------------------------------------------------------------------------------------------------------------------------------------------------------------------------------------------------------------------------------------------------------------------------------------------------------------------------------------------------------------------------------------------------------------------------------------------------------------------------------------------------------------------------------------------------------------------------------------------------------------------------------------------------------------------------------------------------------------------------------------------------------------------------------------------------------------------------------------------------------------------------------------------------------------------------------------------------------------------------------------------------------------------------------------------------------------------------------------------------------------------------------------------------------------------------------------------------------------------------------------------------------------------------------------------------------------------------------------------------------------------------------------------------------------------------------------------------------------------------------------------------------------------------------------------------------------------------------------|
| Folder-1 | daily_action-hand_gesture-Make_a_phone_call, daily_action-hand_gesture-Walk,<br>daily_action-hand_gesture-Sweep_Circle, daily_action-hand_gesture-knock,<br>daily_action-hand_gesture-Wave_hand, daily_action-hand_gesture-Zoom_out_with_fingers,<br>daily_action-hand_gesture-Wave_finger, daily_action-hand_gesture-Applaud,<br>daily_action-hand_gesture-Sweep_Cross, daily_action-hand_gesture-Measure_distance,<br>daily_action-hand_gesture-Zoom_in_with_fingers, daily_action-hand_gesture-Sweep_Checkmark,<br>daily_action-hand_gesture-Sweep_diagonal, daily_action-hand_gesture-Dual_hands_heart,<br>daily_action-hand_gesture-Pause, daily_action-sign_language-go,<br>daily_action-sign_language-white, daily_action-sign_language-who,<br>daily_action-sign_language-many, daily_action-sign_language-pizza,<br>daily_action-sign_language-study, daily_action-sign_language-woman,<br>daily_action-sign_language-bed, daily_action-sign_language-cousin,<br>daily_action-sign_language-black, daily_action-sign_language-hot,<br>daily_action-sign_language-before, daily_action-sign_language-fine,<br>daily_action-sign_language-help, daily_action-sign_language-like,<br>daily_action-sign_language-orange, daily_action-sign_language-thanksgiving,<br>daily_action-sign_language-fire, daily_action-sign_language-no,<br>daily_action-sign_language-cool, daily_action-sign_language-computer,<br>daily_action-sign_language-shirt, daily_action-sign_language-mother,<br>daily_action-sign_language-walk, daily_action-sign_language-finish,<br>daily_action-sign_language-bowling, daily_action-sign_language-drink,<br>daily_action-sign_language-thin, daily_action-sign_language-deaf,<br>daily_action-sign_language-yes, daily_action-sign_language-candy,<br>daily_action-sign_language-wrong, daily_action-sign_language-tall,<br>daily_action-chinese_traffic_gesture-LANE_CHANGING, daily_action-chinese_traffic_gesture-RIGHT_TURN,<br>daily_action-chinese_traffic_gesture-PULL_OVER, daily_action-chinese_traffic_gesture-LEFT_TURN_WAITING,<br>daily_action-chinese_traffic_gesture-MOVE_STRAIGHT, daily_action-chinese_traffic_gesture-LEFT_TURN,<br>daily_action-chinese_traffic_gesture-SLOW_DOWN, daily_action-chinese_traffic_gesture-STOP                                                                                                                                                                                                       |
| Folder-2 | daily_action-commuting-ride_horse, daily_action-commuting-ride_bike,<br>daily_action-commuting-ride_motorcycle, daily_action-commuting-push_car,<br>daily_action-commuting-riding_elephant, daily_action-commuting-segway,<br>daily_action-commuting-ride_bicycle, daily_action-commuting-ride_tricycle,<br>daily_action-commuting-ride_scooter, daily_action-vehicle_behavior-Confrontation,<br>daily_action-vehicle_behavior-Overtake, daily_action-vehicle_behavior-Cut_in,<br>daily_action-vehicle_behavior-Deviate, daily_action-vehicle_behavior-Crossing,<br>daily_action-vehicle_behavior-Right_Turn, daily_action-vehicle_behavior-U_Turn,<br>daily_action-vehicle_behavior-Left_Turn, daily_action-vehicle_behavior-Merging,<br>daily_action-social_action-pat, daily_action-social_action-be_pated,<br>daily_action-social_action-hug, daily_action-social_action-laugh,<br>daily_action-social_action-wave, daily_action-social_action-celebrate-siu,<br>daily_action-social_action-highfive, daily_action-social_action-handshake,<br>daily_action-social_action-celebrate-night_night, daily_action-social_action-push,<br>daily_action-social_action-be_pushed, daily_action-social_action-kick,<br>daily_action-social_action-be_kicked, daily_action-social_action-bend,<br>daily_action-social_action-be_bended, daily_action-social_action-be_boxed,<br>daily_action-social_action-box, daily_action-social_action-celebrate-slippery_kneeling,<br>daily_action-social_action-blowing_kisses, daily_action-social_action-salute,<br>daily_action-housework-hanging_clothes, daily_action-housework-plunging_toilet,<br>daily_action-housework-cleaning_glass_surface, daily_action-housework-watering_plants,<br>daily_action-housework-carpentry, daily_action-housework-washing,<br>daily_action-housework-wall_painting, daily_action-housework-knitting,<br>daily_action-housework-ironing, daily_action-housework-sweeping_floor,<br>daily_action-housework-shoe_shining, daily_action-housework-chopping,<br>daily_action-phylogenetic_action-gives_birth_to_a_baby, daily_action-phylogenetic_action-drinking,<br>daily_action-phylogenetic_action-hunts_other_animals, daily_action-phylogenetic_action-sleep,<br>daily_action-phylogenetic_action-eat_cake, daily_action-emergency-heimlich_manuever,<br>daily_action-emergency-rescue_breathing, daily_action-emergency-bandaging,<br>daily_action-emergency-fire_extinguisher, daily_action-emergency-CPR |

Table XII. Motion categories in the folder-3 and folder-4 of the nonoverlapping split.

| Group    | Motions                                                                                                                                                                                                                                                                                                                                                                                                                                                                                                                                                                                                                                                                                                                                                                                                                                                                                                                                                                                                                                                                                                                                                                                                                                                                                                                                                                                                                                                                                                                                                                                                                                                                                                                                                                                                 |
|----------|---------------------------------------------------------------------------------------------------------------------------------------------------------------------------------------------------------------------------------------------------------------------------------------------------------------------------------------------------------------------------------------------------------------------------------------------------------------------------------------------------------------------------------------------------------------------------------------------------------------------------------------------------------------------------------------------------------------------------------------------------------------------------------------------------------------------------------------------------------------------------------------------------------------------------------------------------------------------------------------------------------------------------------------------------------------------------------------------------------------------------------------------------------------------------------------------------------------------------------------------------------------------------------------------------------------------------------------------------------------------------------------------------------------------------------------------------------------------------------------------------------------------------------------------------------------------------------------------------------------------------------------------------------------------------------------------------------------------------------------------------------------------------------------------------------|
| Folder-3 | sports-gym-situp, sports-gym-pushup, sports-gym-dips, sports-gym-burpee, sports-gym-pull, sports-gym-hula hoop, sports-gym-squat, sports-gym-gym_push, sports-gym-pull_up, sports-gym-lunges, sports-gym-frog_jump, sports-gym-plank, sports-gym-lift, sports-basketball-layup, sports-basketball-pass, sports-basketball-drive, sports-basketball-shoot, sports-basketball-interfere_shot, sports-basketball-spinning_basketball, sports-basketball-screen, sports-basketball-jabstep, sports-basketball-dunk, sports-basketball-free_throw, sports-basketball-hookshot, sports-yoga-yoga_firefly, sports-yoga-yoga_gate, sports-yoga-yoga_dancer, sports-yoga-yoga_pigeon, sports-yoga-yoga_cat, sports-yoga-yoga_tree, sports-baseball-bunt, sports-baseball-swing, sports-baseball-catch_catcher, sports-baseball-pitch, sports-gymnastics-flip, sports-gymnastics-balancebeam_rotate, sports-gymnastics-unevenbar_cross, sports-gymnastics-jump, sports-gymnastics-spin, sports-gymnastics-balancebeam_walk, sports-volleyball-pass, sports-volleyball-adjust, sports-volleyball-underhand, sports-volleyball-overhand, sports-soccer-throw, sports-soccer-steal, sports-soccer-shoot, sports-soccer-diving, sports-soccer-header, sports-swimming-butterfly_stroke, sports-swimming-breast_stroke, sports-swimming-backstroke, sports-swimming-freestyle                                                                                                                                                                                                                                                                                                                                                                                                                                          |
| Folder-4 | sports-dance-pop, sports-dance-middle_hip_hop, sports-dance-house, sports-dance-la_style_hip_hop, sports-dance-moonwalk, sports-dance-ballet_jazz, sports-dance-lock, sports-dance-waack, sports-dance-street_jazz, sports-dance-krump, sports-dance-break, sports-taichi_fan, sports-run_starting, sports-surfing, sports-golf, sports-skiing, sports-punch, special-transform-reversion, special-self_replication, special-transform-metamorphosis, special-magic, special-teleport, special-transform-transformation, entertainment-musical_instrument-play_saxophone, entertainment-musical_instrument-play_erhu, entertainment-performance-play_yoyo, entertainment-performance-playing_rubiks_cube, entertainment-musical_instrument-play_guitar, entertainment-smoke, entertainment-musical_instrument-play_pipa, entertainment-musical_instrument-play_bamboon_flute, entertainment-stone_skipping, entertainment-performance-fire_breathing, entertainment-performance-sword_swallowing, entertainment-musical_instrument-play_cello, entertainment-shoot_gun, entertainment-musical_instrument-play_suona, entertainment-photography, entertainment-dart_throw, entertainment-musical_instrument-play_jazzdrum, entertainment-read, entertainment-performance-shake_cocktail, entertainment-performance-dice_stack_shuffle, entertainment-musical_instrument-play_grandpiano, entertainment-musical_instrument-play_violin, entertainment-billiard_hit, entertainment-performance-handstand, entertainment-draw_handgun, entertainment-discuss_throw, entertainment-performance-spinning_plate, entertainment-performance-card_throw, entertainment-musical_instrument-play_piano, entertainment-spraying_wall, entertainment-building_snowman, entertainment-musical_instrument-play_trumpet |

## B. Qualitative Results and Failure Cases

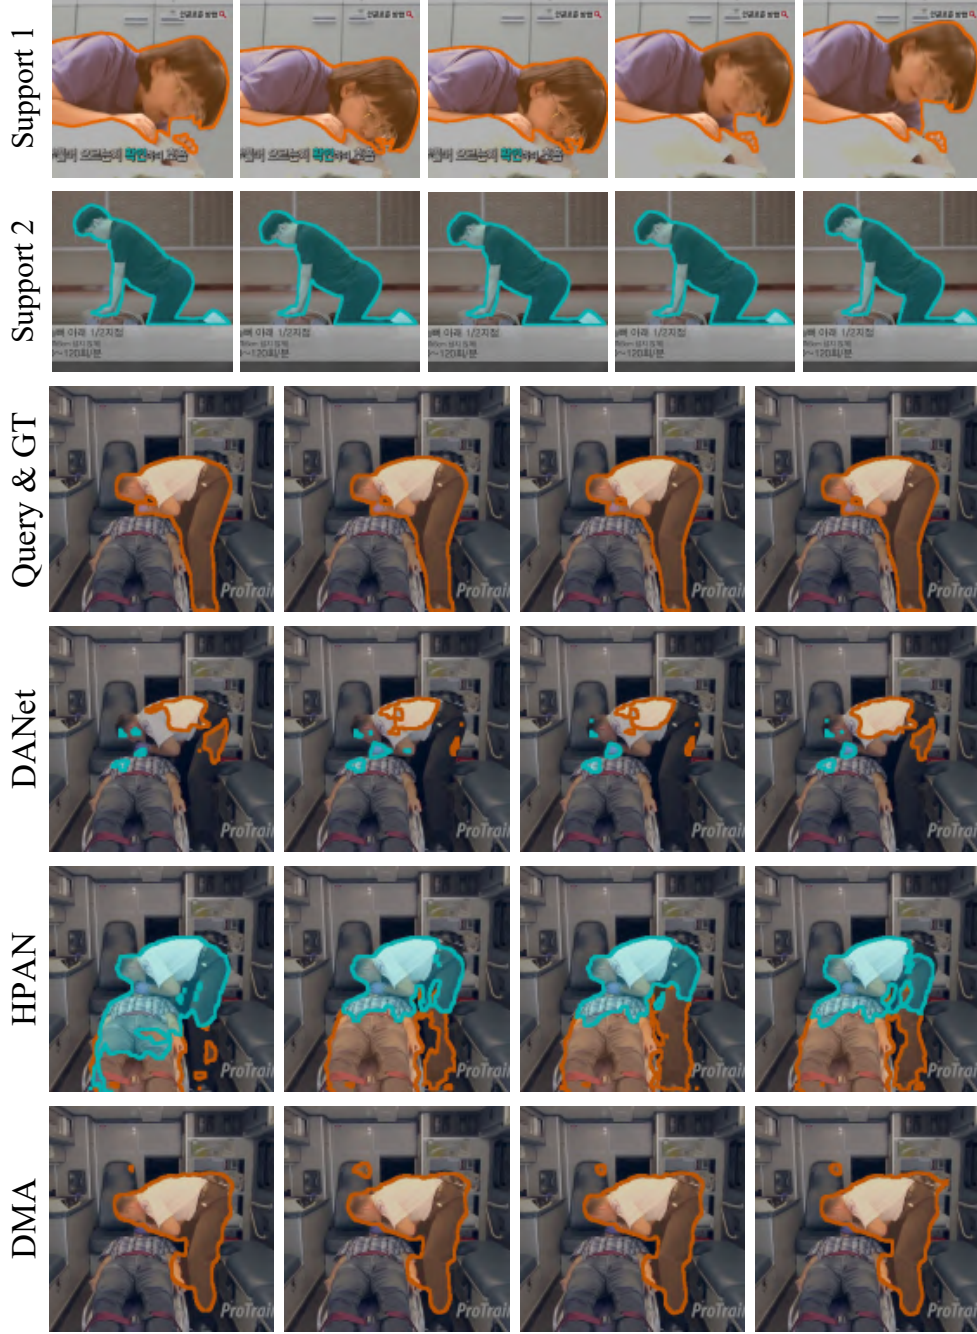

Figure III. Qualitative comparison between existing models and DMA.

In this section, we provide some supplement details of qualitative experiment and failure analysis. As shown in Figure III, DMA correctly segments the person performing the motion **rescue breathing**. This comparison demonstrates the model’s solid performance against significant differences in spatial position and perspective between support and query pairs. DMA performs particularly well when the support instances act as the active party in interaction scenes.

However, our model also exhibits certain limitations. In the case shown in Figure IV, while our proposed DMA successfully discriminates the query instance’s motion category in a fine-grained support pair, it fails to accurately mark

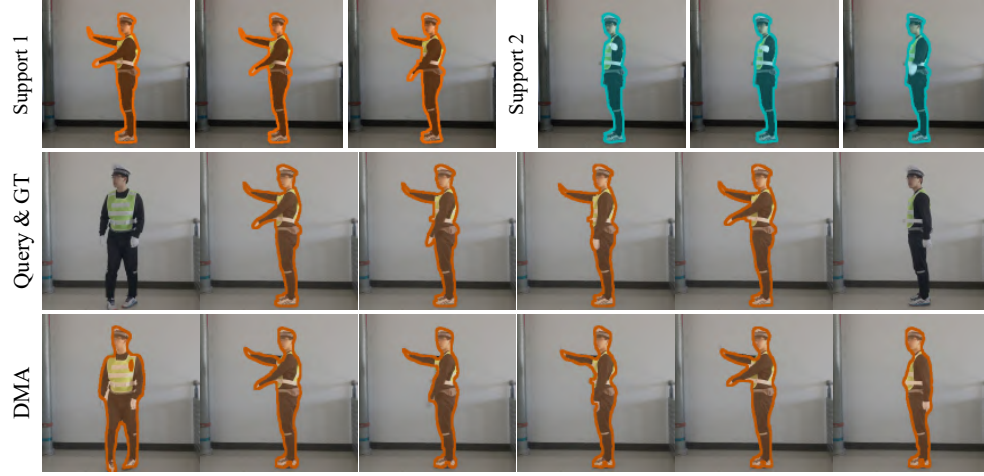

Figure IV. Failure case for fine-grained motion with boundaries.

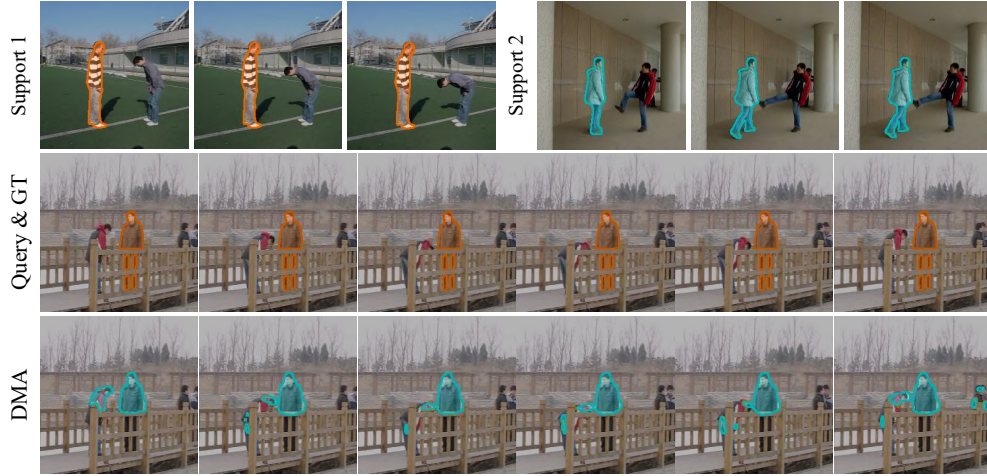

Figure V. Failure case for passive action.

the motion duration. Furthermore, Figure V reveals that DMA lacks sufficient capacity to deeply comprehend detailed interactions and complex relations between different instances. It is challenging for DMA to distinguish between passive actions such as **be bended** and **be kicked**. This limitation stems from DMA's high concentration on motion information solely within the masked region, causing it to ignore the motions of background objects. Future work could address these limitations by incorporating temporal boundary refinement mechanisms and developing more sophisticated attention mechanisms that better capture interactions between foreground and background objects.

## References

- [1] Jun Chen, Ming Hu, Darren J Coker, Michael L Berumen, Blair Costelloe, Sara Beery, Anna Rohrbach, and Mohamed Elhoseiny. Mammalnet: A large-scale video benchmark for mammal recognition and behavior understanding. In *IEEE Conf. Comput. Vis. Pattern Recog.*, 2023. 4
- [2] Jihoon Chung, Cheng-hsin Wu, Hsuan-ru Yang, Yu-Wing Tai, and Chi-Keung Tang. Haa500: Human-centric atomic action dataset with curated videos. In *Int. Conf. Comput. Vis.*, 2021. 2, 3, 4, 5, 6
- [3] Hongdong Li Dongxu Li. Wlasl (world level american sign language) video, 2022. 4
- [4] HE Jian and WANG Weidong. Visual recognition of chinese traffic police gestures based on spatial context and temporal features. *Acta Electronica Sinica*, 2020. 5
- [5] Yu Kong, Yunde Jia, and Yun Fu. Learning human interaction by interactive phrases. In *Eur. Conf. Comput. Vis.*, 2012. 5
- [6] Hildegard Kuehne, Hueihan Jhuang, Estíbaliz Garrote, Tomaso Poggio, and Thomas Serre. Hmdb: a large video database for human motion recognition. In *Int. Conf. Comput. Vis.*, 2011. 2, 3, 5, 6



- [7] Ruilong Li, Shan Yang, David A Ross, and Angjoo Kanazawa. Ai choreographer: Music conditioned 3d dance generation with aist++. In *Int. Conf. Comput. Vis.*, 2021. [2](#)
- [8] Yixuan Li, Lei Chen, Runyu He, Zhenzhi Wang, Gangshan Wu, and Limin Wang. Multisports: A multi-person video dataset of spatio-temporally localized sports actions. In *Int. Conf. Comput. Vis.*, 2021. [2](#)
- [9] Chirag Parikh, Rohit Saluja, CV Jawahar, and Ravi Kiran Sarvadevabhatla. Idd-x: A multi-view dataset for ego-relative important object localization and explanation in dense and unstructured traffic. In *IEEE Int. Conf. Robot. Autom.*, 2024. [6](#)
- [10] Yifan Zhang, Congqi Cao, Jian Cheng, and Hanqing Lu. Egogesture: a new dataset and benchmark for egocentric hand gesture recognition. *IEEE Trans. Multimedia*, 2018. [4](#)
